# Supplementary material for: Sustainable energy storage: Mangifera indica leaf waste-derived activated carbon for long-life, high-performance supercapacitors
Source: Royal Society of Chemistry journal article supplement (doi:10.1039/d3ra08910j), 2024-01-01
Supplement: d3ra08910j1.pdf [file d3ra08910j1.pdf]

## Sustainable Energy Storage: *Mangifera Indica* Leaf Waste-Derived Activated Carbon for Long-Life, High-Performance Supercapacitors

Shreeganesh Subraya Hegde\*, Badekai Ramachandra Bhat\*

Catalysis and Materials Chemistry Laboratory, Department of Chemistry, National Institute  
of Technology Karnataka, Surathkal, Mangalore, 575025, Karnataka, India

\* Corresponding : [hegdeshreeganesh@gmail.com](mailto:hegdeshreeganesh@gmail.com) (ORCID(S): 0000-0003-2678-7481)

[ram@nitk.edu.in](mailto:ram@nitk.edu.in) (ORCID(S): 0000-0002-8169-1055)

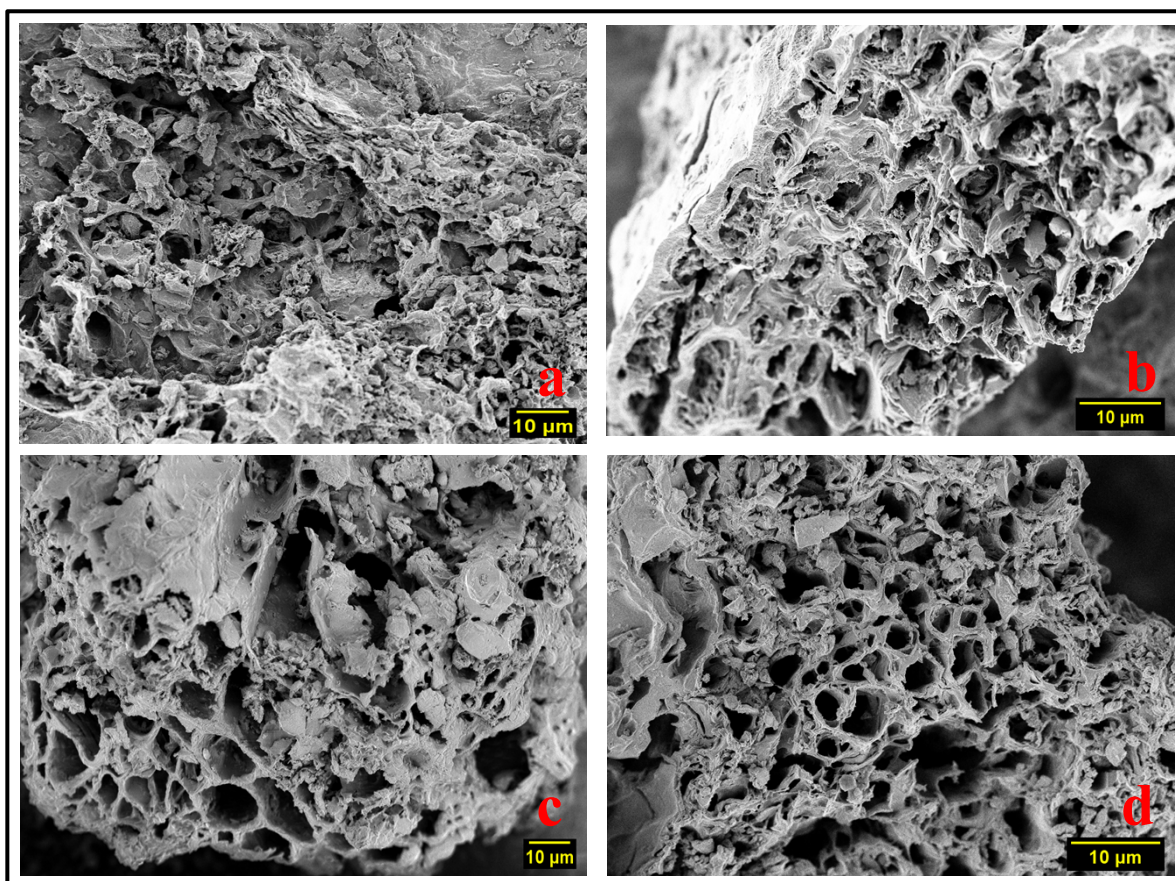

*Figure 1. FESEM images of (a) Carbonized DML sample (b) MLAC-525, (c) MLAC-625, (d) MLAC-725 at low power/voltage.*
